# Supplementary material for: Conditions under which a natural iterative method for calculating the orientation distribution of rodlike particles decreases the free energy at each step
Source: Royal Society of Chemistry journal article supplement (doi:10.1039/d4cp02217c), 2024-01-01
Supplement: d4cp02217c1.pdf [file d4cp02217c1.pdf]

# ESI: Appendices for Conditions under which a natural iterative method for calculating the orientation distribution of rodlike particles decreases the free energy at each step

Alan E. Berger<sup>a</sup>

29 March 2024

## Appendix 1: Derivation of the values of $w_m$ for $W(\gamma) = \sin(\gamma)$

We derive the values for  $\{w_m\}$  as done in Kayser and Raveché [1] but for the ODF normalization used herein. We are expressing  $W(\gamma) = \sin(\gamma)$  as the series  $\sum_{m=0}^{\infty} w_m P_m(\cos \gamma)$ .

The following known integral involving Legendre polynomials  $P_m$  [2, page 798 equation 7.132.1] naturally arises when expanding  $W(\gamma) = \sin(\gamma)$  as a linear combination of Legendre polynomials  $P_m(\cos \gamma)$ . Since this  $W$  satisfies  $W(\pi - \gamma) = W(\gamma)$ , and  $P_m(-x) = -P_m(x)$  for  $m$  odd,  $w_m$  will be 0 for odd integers  $m$ , and so we only need the result when  $m = 0$  or when  $m = 2n$  is an even positive integer:

$$\int_{-1}^1 (1-x^2)^{\frac{1}{2}} P_{2n}(x) dx = \frac{\pi \Gamma(3/2) \Gamma(3/2)}{\Gamma(n+2) \Gamma((3/2)-n) \Gamma(n+1) \Gamma((1/2)-n)} \quad (\text{S.1})$$

Using the change of variable  $x = \cos(\gamma)$  in the integral on the left side of the above, one finds

---

<sup>a</sup> *Department of Surgery, Johns Hopkins University School of Medicine, Baltimore, MD 21287, USA.  
E-mail: aberger9@jhmi.edu*

$$\int_{-1}^1 (1-x^2)^{\frac{1}{2}} P_{2n}(x) dx = \int_0^\pi \sin^2(\gamma) P_{2n}(\cos \gamma) d\gamma \quad (\text{S.2})$$

and one then also has the right side of equation (S.1) from page 338 equation 8.14.16 in [3], or page 172, equation (27) in [4]. Note in some sources (other edition(s) of [2], page 316 equation (16) in [5]), there is a typographical error in this formula, having (in error)  $\Gamma(n + (5/2))$  instead of the correct  $\Gamma(n + 2)$ . One can quickly check that the incorrect version can not be valid from the case  $n = 0$ , since  $\int_0^\pi \sin^2(\gamma) d\gamma = \pi/2$ .

For  $W(\gamma) = \sin(\gamma)$  we have

$$W(\gamma) = \sum_{m=0,2}^{\infty} w_m P_m(\cos \gamma)$$

where the notation means sum over  $m = 0$  and positive even integers. Let  $k = 0$  or let  $k = 2n$  be an even positive integer, and recall that

$$\frac{1}{2} \int_{\gamma=0}^{\pi} P_m(\cos \gamma) P_n(\cos \gamma) \sin(\gamma) d\gamma = \frac{1}{2} \int_{-1}^1 P_m(x) P_n(x) dx = \delta_{mn} \frac{1}{(2n+1)} \quad (\text{S.3})$$

where  $\delta_{mn}$  is 1 when  $m = n$  and 0 otherwise (see, for example, Chapter 11 of Weber and Arfken [6]). Then

$$\int_{\gamma=0}^{\pi} W(\gamma) P_k(\cos \gamma) \sin(\gamma) d\gamma = \int_{\gamma=0}^{\pi} w_k P_k^2(\cos \gamma) \sin(\gamma) d\gamma = \frac{2w_k}{2k+1} \quad (\text{S.4})$$

However, the left hand side of the equation above is (for  $W(\gamma) = \sin(\gamma)$ ):

$$\int_{\gamma=0}^{\pi} \sin^2(\gamma) P_k(\cos \gamma) d\gamma \quad (\text{S.5})$$

so from equations (S.2) and (S.1), we have (with  $k = 2n$ ):

$$\frac{2w_k}{2k+1} = \frac{\pi \Gamma(3/2) \Gamma(3/2)}{\Gamma(n+2) \Gamma((3/2) - n) \Gamma(n+1) \Gamma((1/2) - n)} \quad (\text{S.6})$$

It will be convenient for the rest of this subsection to define

$$v_n = w_k \text{ which is } w_{2n} \quad (\text{S.7})$$

Then we have

$$v_n = w_{2n} = \frac{4n+1}{2} \frac{\pi\Gamma(3/2)\Gamma(3/2)}{\Gamma(n+2)\Gamma((3/2)-n)\Gamma(n+1)\Gamma((1/2)-n)} \quad (\text{S.8})$$

To display the first several values of  $v_n = w_{2n}$  we need some values of the  $\Gamma$  function, available from its basic properties, e.g., [3], [6]:

$$\Gamma(1/2) = \pi^{1/2}, \quad \Gamma(3/2) = \pi^{1/2}/2, \quad \Gamma(-1/2) = -2\pi^{1/2}, \quad \Gamma(-3/2) = (4/3)\pi^{1/2} \quad (\text{S.9})$$

Using these in equation (S.8), we find, as in the Appendix of [7] but with adjusted notation:

$$v_0 = \pi/4, \quad v_1 = -5\pi/32, \quad v_2 = -9\pi/256, \quad v_3 = -65\pi/2^{12} \quad (\text{S.10})$$

Using  $\Gamma(z+1) = z\Gamma(z)$  and so also  $\Gamma(y-1) = \Gamma(y)/(y-1)$  with equation (S.8), we have for  $n \geq 2$  (cf. the Appendix in [7] but note the different notation,  $m$  there is  $2n$  here):

$$v_{n+1} = v_n(16n^3 + 20n^2 - 4n - 5)/(16n^3 + 52n^2 + 44n + 8) \quad (\text{S.11})$$

which shows that all of the  $w_{2n}$  are negative for  $n > 0$ . We can use Raabe's test to show that the series  $\sum_{n=0}^{\infty} v_n$  is absolutely convergent, since

$$\rho \equiv \lim_{n \rightarrow \infty} n \left( \frac{v_n}{v_{n+1}} - 1 \right) \text{ is } 2$$

(which is  $> 1$  so sufficient for convergence).

Note using equations (S.10) and (S.11) one can verify that the eigenvalues  $\lambda_{2n}$  in equation (2.12) of Kayser and Raveché [1] based on their scaling convention are equal to  $8v_n/[\pi(4n+1)]$ .

## Appendix 2: Derivation of the expansion of $K(\theta_1, \theta_2)$ in terms of Legendre polynomials

We provide this expansion following Kayser and Raveché [1], but for our normalizations. The situation here is a particular case of integral operators with symmetric kernels [8]. A special result for Legendre polynomials made use of in [1], [7] and here is the *addition formula* due to Laplace, available in [9], or page 1274 equation 10.3.38 in [10], or page 1015 addition theorem 8.814 in [2]:

With  $\gamma$  given by  $\text{Arc cos}[\sin(\theta_1) \sin(\theta_2) \cos(\phi) + \cos(\theta_1) \cos(\theta_2)]$ , and  $n > 0$  (S.12)

one has

$$P_n(\cos \gamma) = P_n(\cos \theta_1)P_n(\cos \theta_2) + 2 \sum_{m=1}^n \frac{(n-m)!}{(n+m)!} P_n^m(\cos \theta_1)P_n^m(\cos \theta_2) \cos(m\phi) \quad (\text{S.13})$$

where the  $P_n^m$  are *associated Legendre polynomials* and recall  $P_0(x) \equiv 1$ . Now, for the expansion we want, recall that:

$$K(\theta_1, \theta_2) = \frac{1}{2\pi} \int_{\phi=0}^{2\pi} W(\gamma = \text{Arc cos}[\sin(\theta_1) \sin(\theta_2) \cos(\phi) + \cos(\theta_1) \cos(\theta_2)]) d\phi \quad (\text{S.14})$$

We are expressing  $W(\gamma)$  as a series in  $P_m(\cos \gamma)$ :

$$W(\gamma) = \sum_{m=0}^{\infty} w_m P_m(\cos \gamma) \quad (\text{S.15})$$

Substituting equation (S.15) with  $\gamma$  as in equation (S.12) into equation (S.14) and using the addition formula equation (S.13), we see that the integral over  $\phi$  “removes” the associated Legendre polynomials  $P_n^m$  and we have

$$K(\theta_1, \theta_2) = \sum_{m=0}^{\infty} w_m P_m(\cos \theta_1)P_m(\cos \theta_2) \quad (\text{S.16})$$

Now if  $\mathcal{B}(f)$  is defined to be the last term on the right in

$$\begin{aligned} F(f(\theta)) = & \\ & A + \frac{1}{2} \int_{\theta=0}^{\pi} f(\theta) \ln f(\theta) \sin(\theta) d\theta + \frac{1}{2} \int_{\theta=0}^{\pi} f(\theta) V(\theta) \sin(\theta) d\theta + \\ & \frac{B}{2} \int_{\theta_1=0}^{\pi} \int_{\theta_2=0}^{\pi} \frac{1}{4} f(\theta_1) \sin(\theta_1) K(\theta_1, \theta_2) f(\theta_2) \sin(\theta_2) d\theta_2 d\theta_1 \end{aligned} \quad (\text{S.17})$$

so

$$\mathcal{B}(f) = \frac{B}{2} \frac{1}{2} \int_{\theta_1=0}^{\pi} \frac{1}{2} \int_{\theta_2=0}^{\pi} f(\theta_1) \sin(\theta_1) K(\theta_1, \theta_2) f(\theta_2) \sin(\theta_2) d\theta_2 d\theta_1 \quad (\text{S.18})$$

and we substitute  $f$  expanded in terms of Legendre polynomials,

$$f(\theta) = \sum_{n=0}^{\infty} (2n+1) \eta_n P_n(\cos \theta) \quad \text{with} \quad \eta_n = \frac{1}{2} \int_{\theta=0}^{\pi} f(\theta) P_n(\cos \theta) \sin(\theta) d\theta \quad (\text{S.19})$$

and  $K$  given by equation (S.16) into equation (S.18), and recall equation (S.3), we are left with (cf. equation (9) in [7]):

$$\mathcal{B}(f) = \frac{B}{2} \sum_{m=0}^{\infty} w_m \eta_m^2 \quad (\text{S.20})$$

### Appendix 3: Justifying the expansion of $f(\theta)$ as a series in $\{P_n(\cos \theta)\}$

We could appeal to Sturm–Liouville theory on  $L^2([0, \pi])$  with the weighted measure  $d\mu = \sin(\theta) d\theta$ , as in, for example, Al-Gwaiz [11], but here a direct approach suffices. Recalling that

$$\frac{1}{2} \int_{\theta=0}^{\pi} P_m(\cos \theta) P_n(\cos \theta) \sin(\theta) d\theta = \frac{1}{2} \int_{-1}^1 P_m(x) P_n(x) dx = \delta_{mn} \frac{1}{(2n+1)}$$

define the *orthonormal* Legendre polynomials by

$$\mathcal{P}_n(x) = [(2n+1)/2]^{1/2} P_n(x) \quad (\text{S.21})$$

Since the Legendre polynomials  $\{P_n(x)\}$  span the polynomials on  $[-1, 1]$ , e.g., pages 506–507 in [6], and polynomials are dense in the space of continuous functions  $C([-1, 1])$  with the maximum norm by the Stone–Weierstrass theorem, e.g., page 159 in [12], and continuous functions are dense in the space of square integrable functions  $L^2([-1, 1])$ , e.g., page 71 in [13] (with the  $L^2$  norm  $\|f_2 - f_1\|_2$  defined to be  $(\int_{-1}^1 (f_2(x) - f_1(x))^2 dx)^{1/2}$ ), then for any continuous (or  $L^2$ ) function  $\tilde{f}(x)$  on  $[-1, 1]$ , there are unique constants  $\{\xi_j\}$  such that

$$\int_{-1}^1 [\tilde{f}(x) - \sum_{j=0}^J \xi_j \mathcal{P}_j(x)]^2 dx \rightarrow 0 \quad \text{as } J \rightarrow \infty \quad (\text{S.22})$$

and also

$$\sum_{j=0}^{\infty} \xi_j^2 = \int_{-1}^1 \tilde{f}^2(x) dx \quad (\text{S.23})$$

$L^2$  with its associated norm is the “natural” function space / setting in which to consider expansions in terms of Legendre polynomials (and many other special functions, including classical Fourier series).

Now if  $f(\theta)$  is a continuous function on  $[0, \pi]$ , define  $\tilde{f}(x) = f(\text{Arc cos}(x))$ , and let  $\{\xi_j\}$  be as in the two equations above. Then using the change of variable  $x = T(\theta) \equiv \cos(\theta)$ ,

$$\int_{-1}^1 [\tilde{f}(x) - \sum_{j=0}^J \xi_j \mathcal{P}_j(x)]^2 dx = \int_0^\pi [f(\theta) - \sum_{j=0}^J \xi_j \mathcal{P}_j(\cos \theta)]^2 \sin(\theta) d\theta \rightarrow 0 \quad \text{as } J \rightarrow \infty \quad (\text{S.24})$$

so  $f(\theta)$  admits a unique expansion in terms of  $\{\mathcal{P}_n(\cos \theta)\}$  and therefore also in terms of  $\{P_n(\cos \theta)\}$ ; and note when  $f(\pi - \theta) = f(\theta)$  and so  $\tilde{f}(-x) = \tilde{f}(x)$ , the coefficients for the odd indexed Legendre polynomials vanish, and similarly for  $W(\gamma) = \sin(\gamma)$ .

From equation (S.21) and  $\{\mathcal{P}_n(x)\}$  being orthonormal, we have

$$\eta_m = \frac{1}{2} \int_{\theta=0}^{\pi} f(\theta) P_m(\cos \theta) \sin(\theta) d\theta = \left[ \frac{2}{(2m+1)} \right]^{1/2} \frac{1}{2} \int_{-1}^1 \tilde{f}(x) \mathcal{P}_m(x) dx = \left[ \frac{2}{(2m+1)} \right]^{1/2} \frac{1}{2} \xi_m \quad (\text{S.25})$$

and hence  $\sum_{m=0}^{\infty} \eta_m^2$  is finite and  $\sum_{m=0,2}^{\infty} w_m \eta_m^2$  would be bounded even if all we knew was that  $\{w_m\}$  was bounded.

## Appendix 4: The “hat” function construct used in proving a standard result in the calculus of variations

That

$$\ln f(\theta_1) = -\frac{B}{2} \int_{\theta_2=0}^{\pi} K(\theta_1, \theta_2) f(\theta_2) \sin(\theta_2) d\theta_2 - V(\theta_1) - \lambda \quad (\text{S.26})$$

where the constant  $\lambda$  corresponds to the *Lagrange multiplier* for the normalization constraint  $\frac{1}{2} \int_{\theta_1=0}^{\pi} f(\theta_1) \sin(\theta_1) d\theta_1 = 1$  follows from

$$\frac{1}{2} \int_{\theta_1=0}^{\pi} g(\theta_1) \left[ \ln f(\theta_1) + V(\theta_1) + \frac{B}{2} \int_{\theta_2=0}^{\pi} K(\theta_1, \theta_2) f(\theta_2) \sin(\theta_2) d\theta_2 \right] \sin(\theta_1) d\theta_1$$

being 0 for any continuous function  $g(\theta)$  on  $[0, \pi]$  for which  $\int_0^{\pi} g(\theta) \sin(\theta) d\theta = 0$  and  $\max |g(\theta)|$  is sufficiently small is a consequence of the following lemma. The standard “hat” function construct used in the proof is helpful for the discussion in Section 3.4.2

Suppose  $v(x)$  is a continuous function on  $[0, \pi]$ , and for all functions  $g(\theta)$  which are continuous on  $[0, \pi]$  and satisfy  $\int_0^{\pi} g(\theta) \sin(\theta) d\theta = 0$  and, for some fixed positive constant  $k$ ,  $\max |g| \leq k$ , it is true that

$$\int_{\theta=0}^{\pi} g(\theta) v(\theta) \sin(\theta) d\theta = 0 \quad (\text{S.27})$$

Then  $v(x)$  equals a constant on  $[0, \pi]$ .

This follows since otherwise, by continuity, there are two values  $0 < \theta_1 \neq \theta_2 < \pi$  with  $v(\theta_1) < v(\theta_2)$ . We can then construct a function  $g$  for which equation (S.27) fails. Define the “hat” (or “tent” or “spike” or “upside-down” V) function  $H(\theta; \theta_c, h, \epsilon)$  to be the piecewise linear function which is 0 at  $\theta = \theta_c - h$ ;  $\epsilon$  at  $\theta = \theta_c$ ; and 0 at  $\theta = \theta_c + h$ ; and 0 outside of  $[\theta - h, \theta + h]$ , so the *support* of  $H$  is  $[\theta - h, \theta + h]$ . If we take  $\epsilon$  and  $h$  sufficiently small and define  $g$  by

$$g(\theta) = H(\theta; \theta_2, h, \epsilon) / \sin(\theta) - H(\theta; \theta_1, h, \epsilon) / \sin(\theta)$$

then 0 and  $\pi$  will be outside of the support of  $g$  so there will be no issue with dividing by  $\sin(\theta)$ , and  $\int g(\theta) v(\theta) \sin(\theta) d\theta$  will not be 0, while  $g$  satisfies  $\int_0^{\pi} g(\theta) \sin(\theta) d\theta = 0$ , and  $\max |g| \leq k$ .

If the condition  $\int_0^{\pi} g(\theta) \sin(\theta) d\theta = 0$  were not required, then  $v$  would have to be 0 and only one hat function would be needed for the proof.

## Appendix 5: Locations of bifurcations from the isotropic ODF for general $W$

When  $V = 0$ , the isotropic ODF,  $f = 1$ , is always a solution to the calculus of variations equation (S.26). Here it is shown that potential locations of bifurcation points for (S.26) can readily be found in terms of the coefficients  $w_m$  in the expansion of  $W(\gamma)$  when  $V = 0$  and ODFs are assumed to be cylindrically symmetric.

Given

$$f(\theta) = \eta_0 + \sum_{m=1}^{\infty} (2m+1)\eta_m P_m(\cos \theta) \text{ where } \eta_0 = 1 \quad (\text{S.28})$$

$$W(\gamma) = \sum_{n=0}^{\infty} w_n P_n(\cos \gamma) \text{ with } w_n \leq 0 \text{ for } n > 0, \text{ and } \sum_{n=0}^{\infty} |w_n| \text{ finite.} \quad (\text{S.29})$$

and

$$V(\theta) = \sum_{r=0}^{\infty} v_r P_r(\cos \theta) \quad (\text{S.30})$$

and using the orthogonality of the Legendre polynomials

$$\frac{1}{2} \int_{\theta=0}^{\pi} P_m(\cos \theta) P_n(\cos \theta) \sin(\theta) d\theta = \frac{1}{2} \int_{-1}^1 P_m(x) P_n(x) dx = \delta_{mn} \frac{1}{(2n+1)} \quad (\text{S.31})$$

and the expression for the particle interaction contribution to the free energy developed in Appendix 2, the free energy  $F$  can be written as

$$F(f(\theta)) = A + \frac{1}{2} \int_{\theta=0}^{\pi} f(\theta) \ln f(\theta) \sin(\theta) d\theta + \sum_{r=0}^{\infty} v_r \eta_r + \frac{B}{2} w_0 + \frac{B}{2} \sum_{m=1}^{\infty} w_m \eta_m^2 \quad (\text{S.32})$$

A necessary condition for  $f$  to be a local minimum of  $F$  is that, for each  $k > 0$ , the partial derivative of  $F$  with respect to  $\eta_k$

$$\frac{\partial F(f(\theta))}{\partial \eta_k} = \frac{1}{2} \int_{\theta=0}^{\pi} [(1 + \ln f(\theta))(2k+1)P_k(\cos \theta)] \sin(\theta) d\theta + v_k + B w_k \eta_k \quad (\text{S.33})$$

is 0, which is equivalent to  $f$  in equation (S.28) being a solution of the calculus of variations equation (S.26). When  $f = 1$  the first term in the integral above is 0 from equation (S.31) with  $m = 0$ . The last term is also 0 for the isotropic ODF. However, the middle term is only 0 for all positive  $k$  when  $V$  is a constant. Restricting ourselves to that case, and recalling (S.31), the only second partial derivatives that could be nonzero at the isotropic ODF are the diagonal ones:

$$\frac{\partial^2 F(f(\theta))}{\partial \eta_k^2} = \frac{1}{2} \int_{\theta=0}^{\pi} (1/f(\theta))(2k+1)^2 P_k^2(\cos \theta) \sin(\theta) d\theta + Bw_k \quad (\text{S.34})$$

At the isotropic ODF,

$$\frac{\partial^2 F(f(\theta))}{\partial \eta_k^2} = (2k+1) + Bw_k \quad (\text{S.35})$$

If for a given  $B$ , this is positive for all  $k > 0$ , then the isotropic ODF will be a local minimum.

By inspection of (S.35), since  $k$  and  $B$  are positive, only negative  $w_k$  can contribute to instability of the isotropic state. For a given positive integer  $k$  with  $w_k < 0$ ,

$$B_k = (2k+1)/(-w_k) \quad (\text{S.36})$$

is the value of  $B$  at which (S.35) transitions from positive to negative as  $B$  increases. The smallest  $B_k$ , denoted by  $B^*$ , is the location beyond which the isotropic ODF is no longer a local minimum of  $F$  and at which one would in general expect to see a branch of anisotropic local minima. Although each  $B_k$  is a value at which there may be a branch of non-isotropic solutions of the calculus of variations equation (S.26), bifurcations from values of  $B_k > B^*$  generally do not give rise to local minima of  $F$ . Moreover, since the series for  $W$  is assumed to be absolutely convergent,  $|w_k|$  must go to 0 with increasing  $k$ , so there can only be a finite number of  $k$  for which  $B_k$  is equal to a given  $B_j$ . If this number is odd, then there will be a branch of anisotropic solutions of (S.26) at  $B_j$  Vollmer [14], Rabinowitz [15].

From the above, for the *Onsager kernel*  $W(\gamma) = \sin(\gamma)$  for which the odd index  $w_k$  are 0 and  $w_2 = -5\pi/32$  (see Appendix 1),  $B^*$  will be  $B_2 = 32/\pi$ . For the *dipolar kernel*  $W(\gamma) = -\cos(\gamma) = -P_1(\cos \gamma)$  for which  $w_1 = -1$ , the only  $B_k$  is  $B_1 = 3$ . For the *Maier-Saupe kernel*  $W(\gamma) = \frac{1}{3} - \cos^2(\gamma) = -\frac{2}{3}P_2(\cos \gamma)$  for which  $w_2 = -2/3$ , the only  $B_k$  is  $B_2 = 15/2$ . These bifurcation locations agree, as expected, with those found in previous work (after accounting for differences in normalization and notation) [1], [14], [16], [17].

## References

- [1] R. F. Kayser Jr. and H. J. Raveché, *Bifurcation in Onsager's model of the isotropic-nematic transition*, Phys. Rev. A **17** (1978), 2067–2072, DOI <https://doi.org/10.1103/PhysRevA.17.2067>. <https://journals.aps.org/pr/abstract/10.1103/PhysRevA.17.2067>.
- [2] I. S. Gradshteyn and I. M. Ryzhik, *Table of Integrals, Series, and Products: Corrected and Enlarged Edition*, prepared by Alan Jeffrey, Incorporating the fourth edition prepared by Yu. V. Geronimus and M. Yu. Tseytlin, translated by Scripta Technica Inc. from the Russian, Academic Press, Orlando, FL, 1980.
- [3] M. Abramowitz and I. A. Stegun, *Handbook of Mathematical Functions*, Dover, New York, 1972. ninth Dover printing, conforms to the tenth (Dec 1972) printing by the Government Printing Office, except for some additional corrections.
- [4] A. Erdélyi, W. Magnus, F. Oberhettinger, and F. G. Tricomi, *Higher Transcendental Functions Volume I*, McGraw-Hill, New York, 1953. Bateman Manuscript Project, California Institute of Technology.
- [5] ———, *Table of Integral Transforms Volume II*, McGraw-Hill, New York, 1954. Bateman Manuscript Project, California Institute of Technology.
- [6] H. J. Weber and G. B. Arfken, *Essential Mathematical Methods for Physicists*, Elsevier Science, Amsterdam, 2004.
- [7] J. Herzfeld, A. E. Berger, and J. W. Wingate, *A highly convergent algorithm for computing the orientation distribution functions of rodlike particles*, Macromolecules **17** (1984), 1718–1723, DOI <https://doi.org/10.1021/ma00139a014>. <https://pubs.acs.org/doi/pdf/10.1021/ma00139a014>.
- [8] F. G. Tricomi, *Integral Equations*, (republication of the work published by Interscience Publishers, New York, 1957), Dover, Garden City, New York, 1985.
- [9] M. Rahman and Q. M. Tariq, *Addition formulas for  $q$ -Legendre-type functions*, Methods and Applications of Analysis **6** (1999), 3–20, available at [https://www.intlpress.com/site/pub/files/\\_fulltext/journals/maa/1999/0006/0001/MAA-1999-0006-0001-a001.pdf](https://www.intlpress.com/site/pub/files/_fulltext/journals/maa/1999/0006/0001/MAA-1999-0006-0001-a001.pdf).
- [10] P. M. Morse and H. Feshbach, *Methods of Theoretical Physics. II: Chapters 9 to 13*, McGraw-Hill, New York, 1953.
- [11] M. A. Al-Gwaiz, *Sturm-Liouville Theory and its Applications*, Springer-Verlag London Limited, London, 2008.
- [12] W. Rudin, *Principles of Mathematical Analysis*, Third edition, McGraw-Hill, New York, 1976.
- [13] ———, *Real and Complex Analysis*, Second edition (or also the first (1966) and third (1987) editions), McGraw-Hill, New York, 1974.
- [14] M. A. C. Vollmer, *Critical points and bifurcations of the three-dimensional Onsager model for liquid crystals*, Arch. Rational Mech. Anal. **226** (2017), 851–922, DOI [10.1007/s00205-017-1146-8](https://doi.org/10.1007/s00205-017-1146-8). <https://link.springer.com/article/10.1007/s00205-017-1146-8>.
- [15] Rabinowitz P H, *Some global results for nonlinear eigenvalue problems*, JFunctional Analysis **7** (1971), 487–513, DOI [https://doi.org/10.1016/0022-1236\(71\)90030-9](https://doi.org/10.1016/0022-1236(71)90030-9). <https://www.sciencedirect.com/science/article/pii/0022123671900309>.
- [16] I. Fatkullin and V. Slastikov, *Critical points of the Onsager functional on a sphere*, Nonlinearity **18** (2005), 2565–2580, DOI [10.1088/0951-7715/18/6/008](https://doi.org/10.1088/0951-7715/18/6/008). <https://iopscience.iop.org/article/10.1088/0951-7715/18/6/008/meta>.

- [17] H. Liu, H. Zhang, and P. Zhang, *Axial symmetry and classification of stationary solutions of Doi-Onsager equation on the sphere with Maier-Saupe potential*, Commun. Math. Sci. **3** (2005), 201–218. <https://projecteuclid.org/journals/communications-in-mathematical-sciences/volume-3/issue-2/Axial-Symmetry-and-Classification-of-Stationary-Solutions-of-Doi-Onsager/cms/1118778276.full>.
